# Supplementary material
Source: PubMed Central journal article supplement (PMC7817130)
Supplement: pnas.2021096118.sapp.pdf [file pnas.2021096118.sapp.pdf]

## **Supplementary Information for**

### **Adipose Tissue is a Critical Regulator of Osteoarthritis**

Kelsey H. Collins, Kristin L. Lenz, Eleanor N. Pollitt, Daniel Ferguson, Irina Hutson, Luke E. Springer, Arin K. Oestreich, Ruhang Tang, Yun-Rak Choi, Gretchen A. Meyer, Steven L. Teitelbaum, Christine T.N. Pham, Charles A. Harris, Farshid Guilak

**Correspondence to:**

\*Farshid Guilak, PhD

Email: [guilak@wustl.edu](mailto:guilak@wustl.edu)

**This PDF file includes:**

Supplementary Figures S1-S2

Supplementary Tables S1-S5

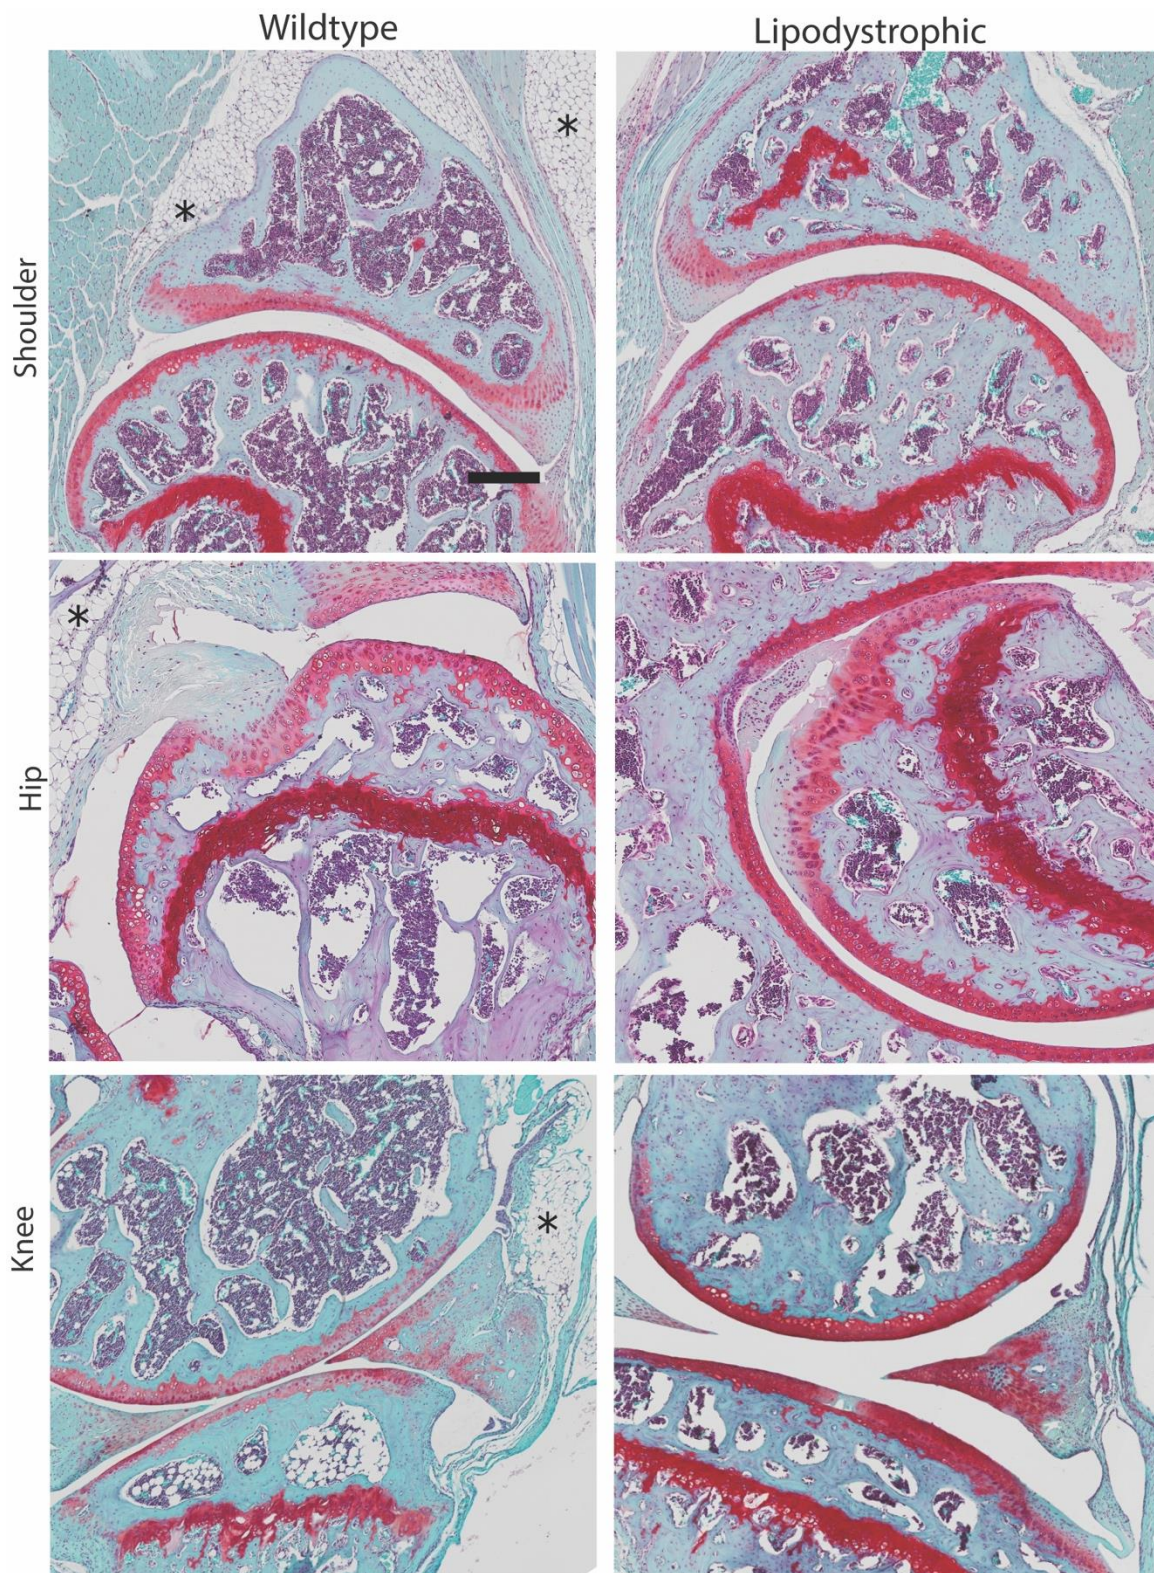

**Supplementary Figure 1. Fat pads are absent in Shoulder, Hip, and Knee Joints of LD mice.** LD mice do not demonstrate fat pads adjacent to shoulder, hip, or knee joints, indicated with black asterisks in the left panels. Scale bar indicates 100 $\mu$ m.

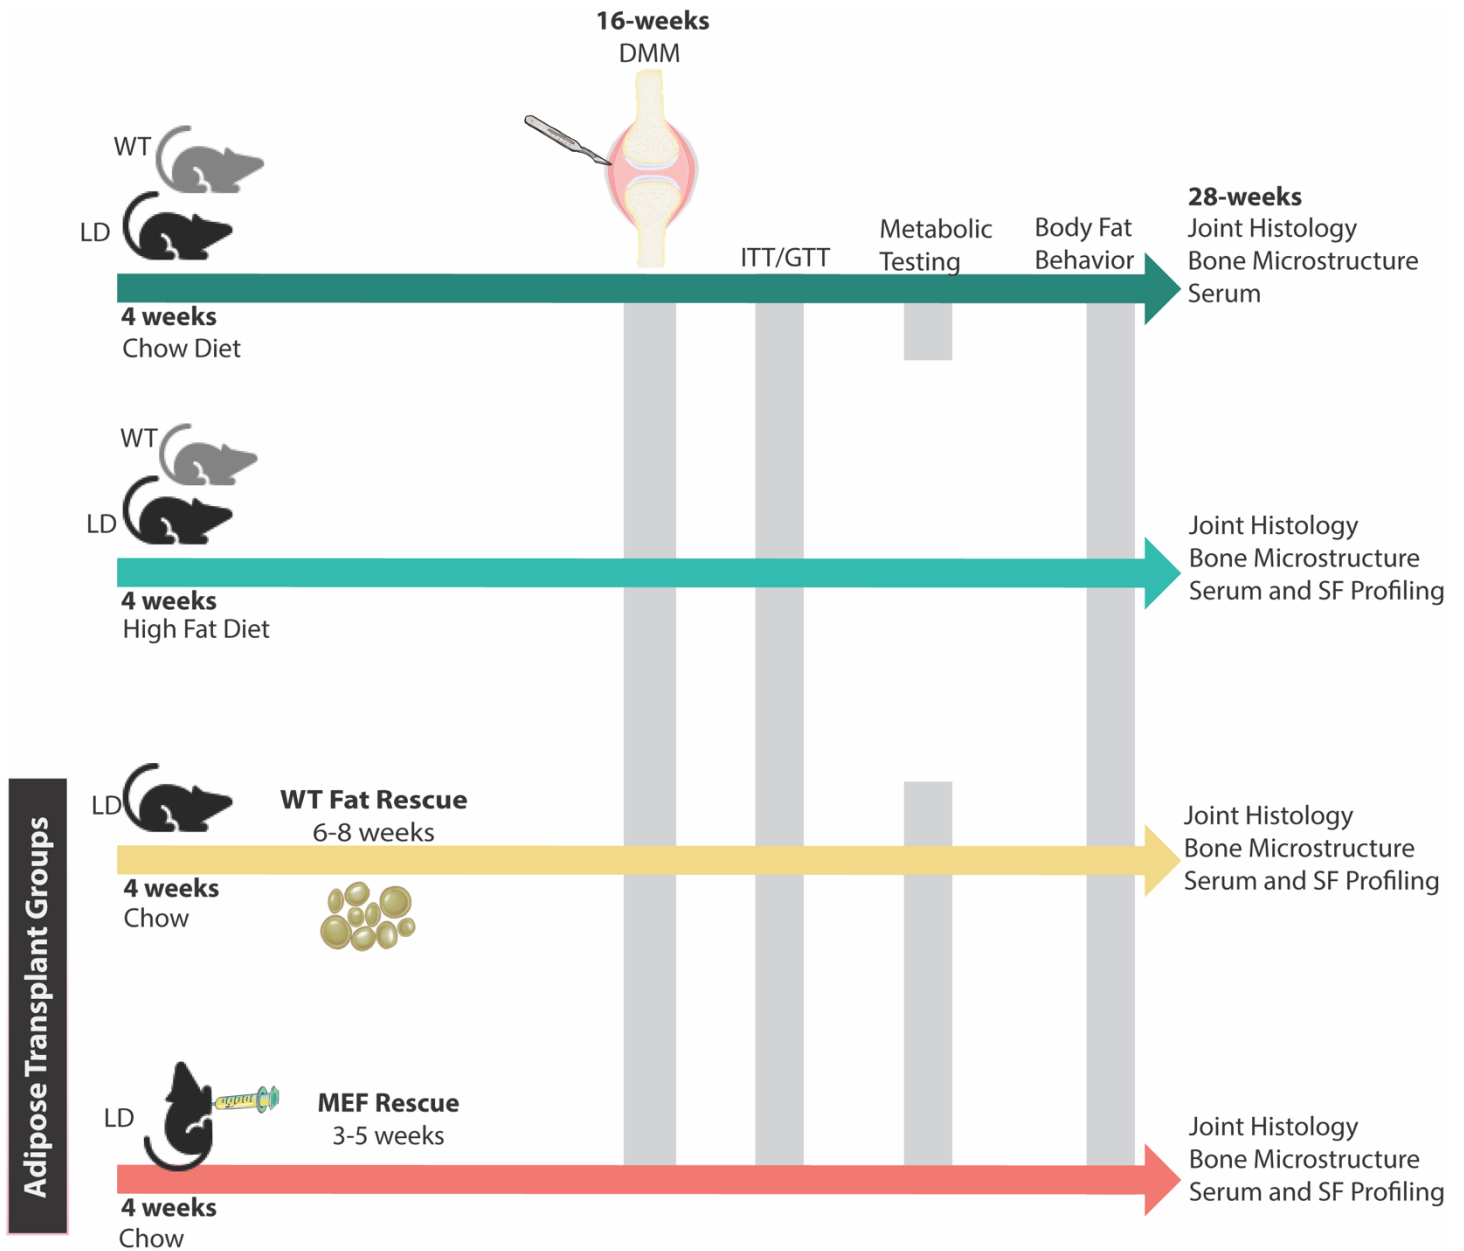

**Supplementary Figure 2. Timeline for study.** First, male and female LD mice and WT littermate controls were fed a chow-control diet from weaning (4 weeks of age) and were challenged with DMM surgery at 16 weeks of age. Metabolic profiles were determined using insulin tolerance tests (ITT) and glucose tolerance tests (GTT) at 20 weeks of age, 4-weeks post DMM. At 22-24 weeks of age, metabolic testing using indirect calorimetry assessments were completed using a Phenomaster device. At 27-weeks of age, one week prior to sacrifice, body composition and behavior assays were completed. Animals were euthanized at 28-weeks of age, 12-weeks post DMM surgery. Tissues were preserved for joint histology and bone microstructure, and serum, synovial fluid, and fecal matter was stored at  $-80^{\circ}\text{C}$  for profiling. The same timeline was followed for male and female LD and WT HFD-fed mice, with the exception of indirect calorimetry metabolic testing – these animals were not evaluated using the Phenomaster. In the transplant groups, LD host mice either received wild type fat rescue (WT Fat-rescue) at 6-8 weeks of age, or a cell-based injection of preadipocyte mouse embryonic fibroblasts (MEF-rescue) at 3-5 weeks of age. Both transplant groups were maintained on chow diets, and followed the same protocol as the chow-fed LD and WT mice. The same euthanization and tissue preparation procedures were employed to all groups of mice at 28-weeks of age.

**Supplementary Table 1.** Serum Changes in Chow and HFD Male Mice by Genotype, data are shown as Mean ± SEM.

| <i>Pro-Inflammatory Mediators</i>  | <b>Chow</b> |                          | <b>HFD</b>              |                            | <b>Main Effects (p&lt;0.05)</b>  |
|------------------------------------|-------------|--------------------------|-------------------------|----------------------------|----------------------------------|
|                                    | WT          | LD                       | WT                      | LD                         |                                  |
| IL-1 $\alpha$ (pg/mL)              | 140.7±20.9  | 368.7±31.6 <sup>a</sup>  | 294.0±28.2 <sup>a</sup> | 243.4±39.5 <sup>a</sup>    | Genotype, Diet*Genotype          |
| IL-1 $\beta$ (pg/mL)               | 5.4±1.1     | 38.3±13.9 <sup>a</sup>   | 8.3±3.5                 | 23.4±8.0 <sup>a</sup>      | Genotype                         |
| IL-6 (pg/mL)                       | 3.8±1.3     | 14.3±4.2 <sup>a</sup>    | 2.7±0.9                 | 11.4±2.65 <sup>a</sup>     | Genotype                         |
| TNF- $\alpha$ (pg/mL)              | 9.1±1.8     | 25.6±5.7 <sup>a</sup>    | 6.5±2.2                 | 17.8±3.7 <sup>a</sup>      | Genotype                         |
| IP-10 / CXCL-10 (pg/mL)            | 114.4±11.5  | 155.2±20.0 <sup>a</sup>  | 127.1±10.0              | 157.5±11.1 <sup>a</sup>    | Genotype                         |
| MCP-1 (pg/mL)                      | 64.5±9.4    | 141.9±27.2 <sup>a</sup>  | 89.7±20.3               | 117.5±35.5 <sup>a</sup>    | Genotype                         |
| IL-12p70 (pg/mL)                   | 83.2±22.9   | 310.4±136.2 <sup>a</sup> | 80.9±22.7               | 250.8±77.3 <sup>a</sup>    | Genotype                         |
| IL-15 (pg/mL)                      | 70.6±6.0    | 75.3±14.6                | 154.9±31.0              | 1140.9±415.8 <sup>ab</sup> | Diet, Genotype,<br>Diet*Genotype |
| IL-17 (pg/mL)                      | 5.8±1.1     | 7.6±1.6                  | 6.7±1.2                 | 14.0±4.4                   | NS                               |
| IFN $\beta$ -1 (pg/mL)             | 157.2±10.4  | 166.9±30.9               | 244.5±36 <sup>a</sup>   | 212.8±32.3 <sup>a</sup>    | Diet                             |
| TARC / CCL-17 (pg/mL)              | 19.0±3.0    | 35.0±6.3 <sup>a</sup>    | 21.7±2.4                | 18.3±2.3                   | Diet p=0.09, Diet*genotype       |
| <i>Anti-Inflammatory Mediators</i> |             |                          |                         |                            |                                  |
| IL-10 (pg/mL)                      | 7.2±1.8     | 81.0±27.9 <sup>a</sup>   | 11.4±4.0                | 74.4±16.2 <sup>a</sup>     | Genotype                         |
| IL-4 (pg/mL)                       | 1.3±0.3     | 5.7±1.5 <sup>a</sup>     | 1.7±0.4                 | 3.7±1.5 <sup>a</sup>       | Genotype                         |
| TIMP-1 (ng/mL)                     | 0.8±0.1     | 2.1±0.2 <sup>a</sup>     | 1.6±0. <sup>a</sup>     | 3.7±0.3 <sup>ab</sup>      | Diet, Genotype                   |

Sidak's Post-hoc Test

<sup>a</sup>p<0.05 compared to WT Chow

<sup>b</sup>p<0.05 compared to WT HFD

n=10-14/group

**Supplementary Table 2.** MicroCT outcomes for all groups: Bone Mineral Density (BMD), Bone Volume/Total Volume (BV/TV), Trabecular Number, and Trabecular Thickness. Data were compared in 3 groups: Chow Male and Female LD and WT) by 3-way ANOVA (limb, sex, genotype), HFD Male and Chow Male LD and WT (limb, diet, genotype), and MEF rescue (MEF-R) and WT fat rescue (WF-R) vs. Chow LD and WT, 2-Way ANOVA (limb, group). Data are separated into contralateral non-surgical limbs (2a) and DMM surgical limbs (2b) for viewing purposes.

**2a. Contralateral Non-Surgical Limbs**

| Outcome                         | Region | Chow       |                          |                       |                       | Main Effects                                                   | HFD        |                       | Main Effects                                                 | Transplant             |                        | Main Effects                  |
|---------------------------------|--------|------------|--------------------------|-----------------------|-----------------------|----------------------------------------------------------------|------------|-----------------------|--------------------------------------------------------------|------------------------|------------------------|-------------------------------|
|                                 |        | Female     |                          | Male                  |                       | M vs. F<br>P<0.05                                              | WT         | LD                    | HFD M vs. Chow<br>M P<0.05                                   | WF-R                   | MEF-R                  | Transplant vs. Chow<br>P<0.05 |
|                                 |        | WT         | LD                       | WT                    | LD                    | Genotype                                                       |            |                       |                                                              |                        |                        |                               |
| BMD<br>(gCaHA/cm <sup>3</sup> ) | LTP    | 0.62±0.02  | 0.84±0.02 <sup>ab*</sup> | 0.66±0.02             | 0.72±0.02             | Sex, Genotype,<br>Sex*Genotype                                 | 0.66±0.02  | 0.71±0.04             | Genotype                                                     | 0.75±0.03              | 0.71±0.04              | Group                         |
|                                 | LFC    | 0.52±0.01  | 0.74±0.04 <sup>a</sup>   | 0.58±0.01             | 0.68±0.04             | Genotype                                                       | 0.58±0.13  | 0.64±0.02             | Genotype                                                     | 0.72±0.04 <sup>a</sup> | 0.70±0.04              | Group                         |
|                                 | MFC    | 0.51±0.02  | 0.75±0.05 <sup>a</sup>   | 0.63±0.02             | 0.71±0.04             | Genotype,<br>Sex*Genotype                                      | 0.67±0.02  | 0.70±0.03             | Genotype                                                     | 0.77±0.03 <sup>a</sup> | 0.75±0.05              | Group                         |
| BV/TV (%)                       | LTP    | 49.2±1.0   | 85.8±2.1 <sup>a*</sup>   | 61.6±1.9              | 70.0±2.7              | Genotype,<br>Sex*Genotype,<br>Limb*Sex*Genotype                | 56.1±2.1   | 67.1±2.6 <sup>c</sup> | Diet, Genotype                                               | 69.4±4.0               | 70.5±5.2               | Group                         |
|                                 | LFC    | 41.5±0.3   | 73.0±4.3 <sup>a</sup>    | 52.9±1.4 <sup>*</sup> | 58.4±2.3              | Genotype,<br>Sex*Genotype,<br>Limb*Sex*Genotype                | 48.7±1.3   | 60.0±1.8 <sup>c</sup> | Genotype                                                     | 64.4±4.4               | 64.9±4.6               | Group                         |
|                                 | MFC    | 42.4±0.4   | 77.3±4.5 <sup>a</sup>    | 58.2±2.5              | 63.0±2.5 <sup>a</sup> | Genotype,<br>Sex*Genotype                                      | 58.9±1.6   | 66.1±2.1              | Genotype,<br>Limb*Genotype                                   | 68.2±3.2               | 70.8±4.8 <sup>a</sup>  | Group                         |
| Trabecular<br>Thickness<br>(mm) | MTP    | 0.08±0.01  | 0.08±0.01                | 0.09±0.01             | 0.08±0.01             | None                                                           | 0.09±0.01  | 0.08±0.01             | None                                                         | 0.09±0.01              | 0.07±0.01              | None                          |
|                                 | LTP    | 0.09±0.001 | 0.09±0.007               | 0.09±0.005            | 0.09±0.006            | Sex*Genotype                                                   | 0.08±0.005 | 0.09±0.004            | Diet, Genotype                                               | 0.11±0.004             | 0.09±0.009             | Group                         |
|                                 | LFC    | 0.10±0.01  | 0.10±0.01                | 0.10±0.01             | 0.10±0.01             | Genotype, Sex*Limb                                             | 0.10±0.01  | 0.10±0.01             | Genotype,<br>Limb*Diet                                       | 0.10±0.01              | 0.10±0.01              | Limb*<br>Group                |
|                                 | MFC    | 0.10±0.01  | 0.11±0.01                | 0.10±0.01             | 0.11±0.01             | Genotype                                                       | 0.11±0.01  | 0.11±0.01             | Limb, Genotype,<br>Limb*Diet,<br>Limb*Genotype               | 0.12±0.01              | 0.11±0.01              | Limb                          |
|                                 | TM     | 0.05±0.01  | 0.07±0.01 <sup>*</sup>   | 0.06±0.01             | 0.05±0.01             | Limb, Genotype,<br>Limb*Sex,<br>Limb*Sex*Genotype              | 0.06±0.01  | 0.06±0.01             | Limb, Limb*Diet,<br>Limb*Genotype,<br>Limb*Diet*<br>Genotype | 0.07±0.01 <sup>b</sup> | 0.07±0.01 <sup>b</sup> | Limb*<br>Group                |
| Trabecular<br>Number<br>(1/mm)  | MTP    | 6.9±0.3    | 11.6±1.3 <sup>a</sup>    | 7.4±0.4               | 8.9±0.5               | Genotype,<br>Sex*Genotype                                      | 7.3±0.2    | 9.7±1.0               | Diet                                                         | 10.0±1.0               | 11.5±1.3               | Group                         |
|                                 | LTP    | 6.6±0.6    | 9.1±0.7                  | 6.5±0.2               | 8.0±0.7               | Limb, Genotype                                                 | 7.6±0.6    | 6.8±0.2               | Genotype                                                     | 6.5±0.2                | 8.6±0.8 <sup>Ad</sup>  | Group                         |
|                                 | LFC    | 4.4±0.1    | 6.8±0.4 <sup>a*</sup>    | 5.6±0.2 <sup>*</sup>  | 5.7±0.2               | Genotype,<br>Sex*Genotype,<br>Limb*Sex*Genotype                | 5.1±0.1    | 5.7±0.1 <sup>c</sup>  | Genotype,<br>Limb*Diet*<br>Genotype                          | 6.2±0.5                | 5.9±0.3                | Limb*<br>Group                |
|                                 | MFC    | 4.6±0.2    | 6.8±0.4 <sup>a*</sup>    | 5.5±0.2               | 5.9±0.1               | Genotype<br>Limb*Genotype<br>Sex*Genotype<br>Limb*Sex*Genotype | 5.6±0.1    | 5.8±0.1               | Genotype                                                     | 5.6±0.2                | 6.7±1.0 <sup>a</sup>   | Group P=0.07                  |
|                                 | TM     | 1.2±0.3    | 3.5±0.8 <sup>a*</sup>    | 0.8±0.1               | 1.8±0.3               | Genotype, Limb*Sex,<br>Limb*Sex*Genotype                       | 1.0±0.2    | 1.8±0.3               | Limb, Genotype,<br>Limb*Diet,<br>Limb*Genotype               | 2.0±0.2                | 2.2±0.4                | Limb, Group                   |

**2b. DMM Surgical Limbs MicroCT Outcomes.**

| Outcome                           | Region | Chow                  |                          |                       |                         | Main Effects                                                   | High-Fat Diet Males |                        | Main Effects                                             | Fat Transplant |                        | Main Effects (P<0.05)   |
|-----------------------------------|--------|-----------------------|--------------------------|-----------------------|-------------------------|----------------------------------------------------------------|---------------------|------------------------|----------------------------------------------------------|----------------|------------------------|-------------------------|
|                                   |        | Female                |                          | Male                  |                         | M V. F<br>P<0.05                                               | Genotype            |                        | HFD M V. Chow M<br>P<0.05                                |                |                        | Transplant V.<br>Chow M |
|                                   |        | WT                    | LD                       | WT                    | LD                      |                                                                | WT                  | LD                     |                                                          | WF-R           | MEF-R                  |                         |
| <i>BMD (gCaHA/cm<sup>3</sup>)</i> | LTP    | 0.61±0.03             | 0.90±0.02 <sup>ab*</sup> | 0.64±0.03             | 0.74±0.04               | Sex, Genotype,<br>Sex*Genotype                                 | 0.63±0.02           | 0.71±0.03              | Genotype                                                 | 0.75±0.04      | 0.70±0.04              | Group                   |
|                                   | LFC    | 0.52±0.01             | 0.70±0.06 <sup>a</sup>   | 0.56±0.02             | 0.67±0.04               | Genotype                                                       | 0.56±0.01           | 0.66±0.02 <sup>c</sup> | Genotype                                                 | 0.64±0.04      | 0.69±0.05              | Group                   |
|                                   | MFC    | 0.56±0.03             | 0.79±0.08 <sup>a</sup>   | 0.61±0.03             | 0.75±0.06               | Genotype, Sex*Genotype                                         | 0.64±0.02           | 0.77±0.03              | Genotype                                                 | 0.70±0.02      | 0.77±0.06 <sup>a</sup> | Group                   |
| <i>BV/TV (%)</i>                  | LTP    | 53.5±2.9 <sup>b</sup> | 74.8±11.1 <sup>a</sup>   | 61.3±2.5 <sup>b</sup> | 73.5±1.8 <sup>a</sup>   | Genotype, Sex*Genotype,<br>Limb*Sex*Genotype                   | 55.0±2.1            | 66.1±2.1 <sup>c</sup>  | Diet, Genotype                                           | 70.0±4.9       | 69.1±4.4               | Group                   |
|                                   | LFC    | 43.0±0.1              | 66.5±8.6 <sup>a</sup>    | 52.5±1.8              | 62.5±2.4                | Genotype, Sex*Genotype,<br>Limb*Sex*Genotype                   | 48.7±1.0            | 59.7±2.2 <sup>c</sup>  | Genotype                                                 | 55.2±5.0       | 64.0±4.9               | Group                   |
|                                   | MFC    | 43.7±1.7              | 71.4±9.4 <sup>a</sup>    | 56.9±1.7 <sup>*</sup> | 71.0±3.0 <sup>a</sup>   | Genotype, Sex*Genotype                                         | 55.2±1.5            | 70.1±2.2 <sup>c</sup>  | Genotype, Limb*Genotype                                  | 61.8±2.6       | 73.1±5.3 <sup>a</sup>  | Group                   |
| <i>Trabecular Thickness (mm)</i>  | MTP    | 0.09±0.01             | 0.08±0.01                | 0.08±0.01             | 0.08±0.01               | None                                                           | 0.08±0.01           | 0.07±0.06              | None                                                     | 0.08±0.01      | 0.07±0.01              | None                    |
|                                   | LTP    | 0.10±0.003            | 0.08±0.001               | 0.09±0.002            | 0.10±0.003              | Sex*Genotype                                                   | 0.09±0.003          | 0.09±0.004             | Diet, Genotype                                           | 0.09±0.001     | 0.08±0.01 <sup>b</sup> | Group                   |
|                                   | LFC    | 0.10±0.01             | 0.10±0.01                | 0.10±0.01             | 0.11±0.01 <sup>^†</sup> | Genotype, Sex*Limb                                             | 0.09±0.01           | 0.10±0.01 <sup>c</sup> | Genotype, Limb*Diet                                      | 0.10±0.01      | 0.09±0.01 <sup>b</sup> | Limb*Group              |
|                                   | MFC    | 0.10±0.01             | 0.12±0.01                | 0.11±0.01             | 0.13±0.01 <sup>^†</sup> | Genotype                                                       | 0.11±0.01           | 0.12±0.01 <sup>c</sup> | Limb, Genotype, Limb*Diet,<br>Limb*Genotype              | 0.12±0.01      | 0.12±0.01              | Limb                    |
|                                   | TM     | 0.06±0.01             | 0.08±0.01                | 0.06±0.01             | 0.07±0.01 <sup>^†</sup> | Limb, Genotype,<br>Limb*Sex,<br>Limb*Sex*Genotype              | 0.06±0.01           | 0.06±0.01 <sup>b</sup> | Limb, Limb*Diet,<br>Limb*Genotype,<br>Limb*Diet*Genotype | 0.07±0.01      | 0.06±0.01 <sup>b</sup> | Limb*Group              |
| <i>Trabecular Number (1/mm)</i>   | MTP    | 6.2±0.4               | 11.1±2.4 <sup>a</sup>    | 7.5±0.4               | 9.5±0.6                 | Genotype, Sex*Genotype                                         | 8.7±0.4             | 12.5±1.7               | Diet                                                     | 12.5±3.1       | 13.0±3.4               | Group                   |
|                                   | LTP    | 5.3±0.1               | 7.4±0.4                  | 6.7±0.4               | 6.9±0.4                 | Limb, Genotype                                                 | 6.0±0.1             | 7.1±0.4                | Genotype                                                 | 6.8±0.4        | 8.2±0.7                | Group                   |
|                                   | LFC    | 4.7±0.1               | 6.3±0.3 <sup>a</sup>     | 5.3±0.2               | 5.7±0.2                 | Genotype, Sex*Genotype,<br>Limb*Sex*Genotype                   | 5.3±0.1             | 5.7±0.1                | Genotype, Limb*Diet*<br>Genotype                         | 5.3±0.4        | 6.6±0.4 <sup>ad</sup>  | Limb*Group              |
|                                   | MFC    | 4.9±0.2               | 6.1±0.3 <sup>†</sup>     | 5.3±0.2               | 6.0±0.1 <sup>a</sup>    | Genotype<br>Limb*Genotype<br>Sex*Genotype<br>Limb*Sex*Genotype | 5.2±0.1             | 5.7±0.1                | Genotype                                                 | 5.2±0.2        | 6.0±0.3                | Group P=0.07            |
|                                   | TM     | 1.0±0.2               | 3.1±0.8                  | 0.9±0.1               | 3.1±0.4 <sup>^†</sup>   | Genotype, Limb*Sex,<br>Limb*Sex*Genotype                       | 0.9±0.2             | 2.0±0.2 <sup>cb</sup>  | Limb, Genotype, Limb*Diet,<br>Limb*Genotype              | 2.1±0.3        | 3.0±1.0 <sup>a</sup>   | Limb, Group             |

Sidak's Post hoc for 3-way ANOVAS, Tukey's post-hoc for 2-way ANOVA

<sup>a</sup>p<0.05 compared to WT chow control,

<sup>b</sup>p<0.05 vs. LD-M chow,

<sup>c</sup>p<0.05 compared to WT HFD control,

<sup>d</sup>p<0.05 WT fat transplant

\*p<0.05 by sex,

†p<0.05 within group by limb,

male n= 9-17/group, female n=5-12

**Abbreviations:** LTP: lateral tibial plateau, LFC: lateral femoral condyle, MFC: Medial femoral condyle; MTP: Medial tibial plateau, TM: Tibial Metaphysis; BMD: Bone Mineral Density, BV/TV: Bone Volume/Total Volume

**Supplementary Table 3. Male Synovial Fluid Profiles from Chow and High Fat Diet-fed LD and WT Mice.**

| Genotype<br>(pg/mL) | Chow        |              |                        |                        | HFD                    |                          |                           |                           | Main Effects<br>(p<0.05)                 |
|---------------------|-------------|--------------|------------------------|------------------------|------------------------|--------------------------|---------------------------|---------------------------|------------------------------------------|
|                     | WT          |              | LD                     |                        | WT                     |                          | LD                        |                           |                                          |
|                     | Con         | DMM          | Con                    | DMM                    | Con                    | DMM                      | Con                       | DMM                       |                                          |
| IL-7                | 67.2±13.0   | 30.2±9.7     | 50.0±12.3              | 39.7±9.0               | 57.2±19.5              | 28.7±8.7                 | 37.2±9.4                  | 30.4±8.7                  | Limb                                     |
| Fractalkine         | 8.7±0.3     | 9.3±1.0      | 8.5±0.5                | 8.0±0.4                | 11.4±1.0               | 11.3±1.0                 | 10.2±0.8                  | 9.5±0.8                   | Limb, Diet                               |
| G-CSF               | 44.7±6.3    | 36.4±8.1     | 63.5±10.3              | 63.1±12.2              | 32.7±7.1               | 40.5±9.3                 | 38.8±7.4                  | 54.4±9.3                  | Genotype                                 |
| IL-6                | 287.4±102.2 | 176.4±96.2   | 230.1±89.7             | 978.5±427.4            | 622.8±257.9            | 441.4±155.3              | 1176.4±615.1              | 1859.6±770.0              | Genotype                                 |
| IL-12p40            | 226.8±78.0  | 259.9±86.0   | 189.4±52.3             | 103.5±33.8             | 313.1±66.9             | 305.6±55.0               | 138.6±27.0                | 102.0±31.3                | Genotype                                 |
| IL-15               | 489.1±78.6  | 472.6±59.1   | 357.9±78.0             | 405.2±70.3             | 549.5±58.7             | 415.3±64                 | 311.7±43.4                | 408.6±53.6                | Genotype                                 |
| IFN-γ               | 87.3±24.7   | 105.8±28.8   | 77.7±17.2              | 91.2±19.9              | 77.5±14.5              | 75.3±23.2                | 23.7±9.3                  | 31.7±12.9                 | Diet, Genotype                           |
| IL-16               | 3.1±0.6     | 4.2±0.6      | 5.9±1.2 <sup>a</sup>   | 4.4±0.6                | 1.8±0.5                | 2.2±0.5                  | 3.0±0.3                   | 3.3±0.5                   | Diet, Genotype                           |
| MIP-2               | 9780±529    | 10059±584    | 9913±601               | 9962±334               | 10028±442              | 8468±615                 | 7468±642                  | 7720±436                  | Diet, Genotype,<br>Diet*genotype         |
| IL-1β               | 146.7±28.6  | 115.4±28.5   | 85.1±20.0              | 117.3±25.9             | 140.5±9.0              | 73.5±19.3                | 85.1±19.1                 | 92.0±23.0                 | Limb*Genotype                            |
| MCP-5               | 101.3±22.3  | 110.0±4.4    | 150.8±19.5             | 105.2±12.0             | 48.7±7.2               | 147.0±35.1               | 97.4±13.0                 | 105.9±20.6                | Limb*Genotype,<br>Diet*Genotype          |
| MDC                 | 20.5±4.0    | 40.1±7.7     | 82.2±14.0 <sup>a</sup> | 75.7±23.0 <sup>a</sup> | 29.6±6.6               | 100.0±22.7 <sup>ab</sup> | 21.4±4.8                  | 27.8±4.7                  | Limb,<br>Limb*Genotype,<br>Diet*Genotype |
| TNF-α               | 9.4±1.0     | 14.0±2.3     | 11.0±2.2               | 9.3±1.5                | 6.6±0.7                | 6.7±1.3                  | 5.6±1.0                   | 5.7±1.1                   | Diet                                     |
| Eotaxin             | 556.9±67.3  | 541.3±54.0   | 521.7±69.2             | 431.0±50.0             | 647.4±163.4            | 639.0±94.0               | 679.9±115.0               | 860.4±236.0               | Diet                                     |
| LIX                 | 618.3±169.0 | 1268.9±292.1 | 634.3±151.0            | 1018.0±261.0           | 520.7±164.0            | 445.7±121.4              | 167.8±58.3                | 365.6±125.0               | Diet                                     |
| IL-1α               | 18.2±8.5    | 263.2±75.0   | 286.15±90.3            | 109.1±30.0             | 881.7±163.9            | 612.7±232.0              | 1135.9±347.0 <sup>a</sup> | 1475.7±478.6 <sup>a</sup> | Diet                                     |
| IP-10               | 20.2±5.1    | 18.4±3.3     | 31.8±6.2               | 32.2±5.8               | 53.3±10.8 <sup>a</sup> | 70.0±17.0 <sup>a</sup>   | 51.3±6.1 <sup>a</sup>     | 70.3±11.2 <sup>a</sup>    | Diet                                     |

Dunnet's Post-hoc Test

<sup>a</sup>p<0.05 compared to WT chow contralateral

<sup>b</sup>p<0.05 compared to WT HFD contralateral

n= 10-12/group

**Supplementary Table 4.** Serum Changes in WT Fat rescue (WF-R) and MEF rescue (MEF-R) Corrected Mice by Genotype, data are shown as Fold Change relative to WT contralateral, Mean  $\pm$  SEM.

| (Fold Change)   | Chow          |                            | Fat-Transplant              |                            | 1-way ANOVA p-value |
|-----------------|---------------|----------------------------|-----------------------------|----------------------------|---------------------|
|                 | WT            | LD                         | WF-R                        | MEF-R                      |                     |
| MCP-5           | 1.1 $\pm$ 0.1 | 1.0 $\pm$ 0.2              | 2.2 $\pm$ 0.3 <sup>a</sup>  | 1.9 $\pm$ 0.3 <sup>a</sup> | 0.002               |
| IL-15           | 1.0 $\pm$ 0.2 | 1.0 $\pm$ 0.2              | 1.9 $\pm$ 0.6               | 3.6 $\pm$ 1.1 <sup>a</sup> | 0.015               |
| IFN $\beta$ -1  | 1.0 $\pm$ 0.3 | 0.8 $\pm$ 0.1              | 21.5 $\pm$ 8.8 <sup>a</sup> | 7.4 $\pm$ 2.3              | 0.011               |
| TARC / CCL-17   | 1.0 $\pm$ 0.2 | 1.9 $\pm$ 0.4 <sup>a</sup> | 1.9 $\pm$ 0.2 <sup>a</sup>  | 1.3 $\pm$ 0.1              | 0.0187              |
| IL-4 (pg/mL)    | 1.0 $\pm$ 0.3 | 2.5 $\pm$ 1.0              | 0.6 $\pm$ 0.1               | 0.6 $\pm$ 0.1              | 0.0420              |
| MCP-1           | 1.1 $\pm$ 0.2 | 1.7 $\pm$ 0.4              | 0.9 $\pm$ 0.2               | 0.9 $\pm$ 0.1              | 0.094               |
| IL-12p70        | 1.0 $\pm$ 0.1 | 1.8 $\pm$ 0.5              | 1.1 $\pm$ 0.2               | 1.1 $\pm$ 0.2              | 0.094               |
| LIF             | 0.9 $\pm$ 0.3 | 1.6 $\pm$ 0.2              | 2.0 $\pm$ 0.8               | 2.1 $\pm$ 0.7 <sup>a</sup> | 0.167               |
| IL-1 $\beta$    | 1.0 $\pm$ 0.2 | 3.0 $\pm$ 1.2 <sup>a</sup> | 0.5 $\pm$ 0.2               | 0.5 $\pm$ 0.2              | 0.187               |
| IP-10 / CXCL-10 | 1.0 $\pm$ 0.1 | 1.8 $\pm$ 0.5              | 1.0 $\pm$ 0.3               | 1.1 $\pm$ 0.2              | 0.181               |

Dunnet's Post-hoc Test

<sup>a</sup>p<0.05 compared to WT

<sup>b</sup>p<0.05 compared to

n=10-14/group



**Supplementary Table 5.** Synovial Fluid Changes in MEF/WT expressed as fold change relative to WT contralateral (Mean ± SEM).

| Genotype    | Chow    |          |                       |                      | Transplant            |                       |                       |                        | Main Effects (p<0.05)   |
|-------------|---------|----------|-----------------------|----------------------|-----------------------|-----------------------|-----------------------|------------------------|-------------------------|
|             | WT      |          | LD                    |                      | WT fat                |                       | MEF                   |                        |                         |
| Limb        | Con     | DMM      | Con                   | DMM                  | Con                   | DMM                   | Con                   | DMM                    |                         |
| IL-7        | 1.1±0.2 | 0.5±0.1  | 0.8±0.2               | 0.7±0.1              | 1.4±0.1 <sup>c</sup>  | 1.6±0.1 <sup>ab</sup> | 1.2±0.1               | 1.7±0.1 <sup>ab</sup>  | Limb*group, group       |
| Fractalkine | 1.0±0.1 | 1.0±0.1  | 0.9±0.1               | 0.9±0.1              | 1.4±0.1               | 1.3±0.2               | 1.7±0.1 <sup>cd</sup> | 1.9±0.2 <sup>ab</sup>  | Group                   |
| G-CSF       | 1.0±0.2 | 0.8±0.2  | 1.4±0.3               | 1.6±0.3              | 1.6±0.2               | 2.1±0.3 <sup>a</sup>  | 1.2±0.1               | 1.4±0.1                | Group                   |
| IL-12p40    | 1.0±0.4 | 1.1±0.4  | 1.0±0.3               | 0.9±0.4              | 1.5±0.1               | 1.8±0.1               | 1.3±0.1               | 1.6±0.1                | Group                   |
| IL-15       | 1.0±0.2 | 1.0±0.1  | 0.7±0.2               | 0.8±0.1              | 1.2±0.1               | 1.3±0.2               | 1.0±0.1               | 1.4±0.1 <sup>b</sup>   | Group                   |
| IFN-γ       | 1.0±0.3 | 0.7±0.2  | 0.7±0.2               | 0.7±0.2              | 0.8±0.1               | 0.9±0.1               | 0.8±0.1               | 1.0±0.1                | NS                      |
| IL-16       | 1.0±0.2 | 1.3±0.2  | 1.9±0.4               | 1.6±0.3              | 0.6±0.3 <sup>c</sup>  | 0.3±0.1 <sup>ab</sup> | 0.5±0.2 <sup>c</sup>  | 0.4±0.1 <sup>b</sup>   | Group                   |
| MIP-2       | 1.0±0.1 | 1.0±0.1  | 1.0±0.1               | 1.1±0.1              | 1.6±0.1 <sup>cd</sup> | 1.7±0.1 <sup>ab</sup> | 1.6±0.1 <sup>cd</sup> | 1.7±0.1 <sup>ab</sup>  | Group                   |
| IL-1β       | 1.0±0.2 | 12.3±3.1 | 0.7±0.2               | 6.0±1.6 <sup>a</sup> | 1.6±0.3               | 1.9±0.3 <sup>a</sup>  | 1.0±0.3               | 1.4±0.4 <sup>ab</sup>  | Limb, Group, Limb*group |
| MCP-5       | 0.9±0.3 | 0.7±0.1  | 0.9±0.2               | 0.8±0.2              | 0.6±0.1               | 0.6±0.1               | 0.8±0.1               | 0.9±0.1                | NS                      |
| MDC         | 1.0±0.2 | 2.0±0.4  | 3.7±0.7 <sup>d</sup>  | 3.7±1.2              | 0.2±0.1 <sup>c</sup>  | 0.3±0.1 <sup>b</sup>  | 0.2±0.1 <sup>c</sup>  | 0.4±0.2 <sup>b</sup>   | Group                   |
| TNF-α       | 1.0±0.2 | 1.2±0.2  | 1.2±0.3               | 0.9±0.1              | 1.3±0.2               | 1.6±0.1 <sup>b</sup>  | 1.1±0.2               | 1.4±0.1                | Group p=0.086           |
| Eotaxin     | 1.0±0.1 | 1.0±0.1  | 0.9±0.1               | 0.7±0.1              | 0.1±0.1 <sup>cd</sup> | 0.1±0.1 <sup>ab</sup> | 0.2±0.1 <sup>cd</sup> | 0.2±0.1 <sup>ab</sup>  | Group                   |
| LIF         | 1.0±0.2 | 1.0±0.2  | 0.9±0.3               | 0.2±0.1              | 0.9±0.1               | 1.4±0.2 <sup>b</sup>  | 1.4±0.3               | 1.5±0.2 <sup>b</sup>   | Group                   |
| TARC        | 1.0±0.3 | 1.6±0.3  | 1.4±0.2               | 0.8±0.2 <sup>a</sup> | 0.4±0.1 <sup>c</sup>  | 0.5±0.1 <sup>a</sup>  | 0.5±0.1 <sup>c</sup>  | 0.7±0.3 <sup>a</sup>   | Group, Limb*Group       |
| IL-1α       | 1.0±0.5 | 14.4±4.0 | 15.7±5.0 <sup>d</sup> | 5.3±1.6              | 17.9±2.1 <sup>d</sup> | 23.3±2.2 <sup>b</sup> | 18.0±0.9 <sup>d</sup> | 21.6±2.06 <sup>b</sup> | Group, Limb*Group       |

Sidak's Post-hoc Test

<sup>a</sup>p<0.05 vs WT DMM

<sup>b</sup>p<0.05 vs LD DMM

<sup>c</sup>p<0.05 vs LD Con

<sup>d</sup>p<0.05 vs WT Con

n= 10-12/group
